# Supplementary material for: Interactions of Habitual Coffee Consumption by Genetic Polymorphisms with the Risk of Prediabetes and Type 2 Diabetes Combined
Source: PubMed Central journal article supplement (PMC7468962; doi:10.3390/nu12082228), 2020-07-26
Supplement: nutrients-12-02228-s001.pdf [file nutrients-12-02228-s001.pdf]

1 **Table S1.** Baseline characteristics of the participants included in the GWAS on coffee consumption

|                                         | <b>Non-coffee consumers<br/>(n=1,788)</b> | <b>Coffee consumers<br/>(n=6,080)</b> |
|-----------------------------------------|-------------------------------------------|---------------------------------------|
| Age, mean $\pm$ SD (years)              | 54.7 $\pm$ 9.0                            | 50.8 $\pm$ 8.6                        |
| Sex, n (%)                              |                                           |                                       |
| Men                                     | 645 (36.1)                                | 3,040 (50.0)                          |
| Women                                   | 1,143 (64.9)                              | 3,040 (50.0)                          |
| BMI, mean $\pm$ SD (kg/m <sup>2</sup> ) | 24.1 $\pm$ 3.2                            | 24.7 $\pm$ 3.1                        |
| Alcohol consumption, n (%)              |                                           |                                       |
| Never drinkers                          | 1,184 (66.2)                              | 2,949 (48.5)                          |
| $\leq$ 5 g/day                          | 215 (12.0)                                | 1,112 (18.3)                          |
| 5 to $\leq$ 10 g/day                    | 73 (4.1)                                  | 462 (7.6)                             |
| 10 to $\leq$ 20 g/day                   | 108 (6.1)                                 | 554 (9.1)                             |
| $>$ 20 g/day                            | 208 (11.6)                                | 1,003 (16.5)                          |

3 Abbreviations: SD, standard deviation; BMI, body mass index.

4 **Table S2.** The significant SNPs discovered from the GWAS on coffee consumption

| Chr | SNP         | Position    | Locus    | Minor allele | Major allele | OR <sup>1</sup> | Beta <sup>2</sup> | P-value <sup>3</sup>    |
|-----|-------------|-------------|----------|--------------|--------------|-----------------|-------------------|-------------------------|
| 12  | rs2074356   | 112,645,401 | 12q24.13 | A            | G            | 1.375           | 0.3185            | 6.62 × 10 <sup>-8</sup> |
| 12  | rs116873087 | 112,511,913 | 12q24.13 | C            | G            | 1.343           | 0.2949            | 1.68 × 10 <sup>-7</sup> |
| 12  | rs144504271 | 112,627,350 | 12q24.13 | A            | G            | 1.352           | 0.3016            | 1.74 × 10 <sup>-7</sup> |
| 12  | rs3782886   | 112,110,489 | 12q24.12 | C            | T            | 1.330           | 0.2852            | 2.67 × 10 <sup>-7</sup> |
| 12  | rs11066001  | 112,119,171 | 12q24.12 | C            | T            | 1.330           | 0.2852            | 3.75 × 10 <sup>-7</sup> |
| 12  | rs79105258  | 111,718,231 | 12q24.11 | A            | C            | 1.338           | 0.2912            | 3.89 × 10 <sup>-7</sup> |
| 12  | rs4646776   | 112,230,019 | 12q24.12 | C            | G            | 1.322           | 0.2791            | 4.75 × 10 <sup>-7</sup> |
| 12  | rs12231737  | 112,574,616 | 12q24.13 | T            | C            | 1.318           | 0.2761            | 5.07 × 10 <sup>-7</sup> |
| 12  | rs3809297   | 111,609,727 | 12q24.11 | T            | G            | 1.326           | 0.2822            | 5.26 × 10 <sup>-7</sup> |
| 12  | rs671       | 112,241,766 | 12q24.12 | A            | G            | 1.317           | 0.2754            | 6.67 × 10 <sup>-7</sup> |
| 12  | rs2188380   | 111,386,127 | 12q24.11 | C            | T            | 1.336           | 0.2897            | 1.21 × 10 <sup>-6</sup> |
| 12  | rs149607519 | 111,389,437 | 12q24.11 | G            | C            | 1.336           | 0.2897            | 1.21 × 10 <sup>-6</sup> |
| 12  | rs11065828  | 111,629,389 | 12q24.11 | A            | C            | 1.304           | 0.2654            | 1.26 × 10 <sup>-6</sup> |
| 12  | rs12229654  | 111,414,461 | 12q24.11 | G            | T            | 1.332           | 0.2867            | 1.49 × 10 <sup>-6</sup> |
| 12  | rs11066325  | 112,930,475 | 12q24.13 | C            | T            | 1.293           | 0.2570            | 5.13 × 10 <sup>-6</sup> |
| 12  | rs12227162  | 111,367,244 | 12q24.11 | T            | C            | 1.315           | 0.2738            | 5.51 × 10 <sup>-6</sup> |
| 12  | rs11066280  | 112,817,783 | 12q24.13 | A            | T            | 1.283           | 0.2492            | 6.02 × 10 <sup>-6</sup> |
| 12  | rs11066015  | 112,168,009 | 12q24.12 | A            | G            | 1.280           | 0.2469            | 7.79 × 10 <sup>-6</sup> |

5 Abbreviations: Chr, chromosome; SNP, single nucleotide polymorphism; OR, odds ratio. <sup>1</sup> Odds ratio for the  
6 habitual coffee consumption; <sup>2</sup> Beta (β) coefficient was obtained from the GWAS; <sup>3</sup> P-value was calculated using  
7 a Wald test from logistic regression model adjusted for age (years; continuous), sex, and alcohol consumption  
8 (g/day; continuous).

9 **Table S3.** The significant SNPs discovered from the GWAS on coffee consumption after additionally adjusted  
 10 for BMI

| Chr | SNP         | Position    | Locus    | Minor allele | Major allele | OR <sup>1</sup> | Beta <sup>2</sup> | P-value <sup>3</sup>  |
|-----|-------------|-------------|----------|--------------|--------------|-----------------|-------------------|-----------------------|
| 12  | rs2074356   | 112,645,401 | 12q24.13 | A            | G            | 1.386           | 0.3264            | $3.31 \times 10^{-8}$ |
| 12  | rs144504271 | 112,627,350 | 12q24.13 | A            | G            | 1.364           | 0.3104            | $8.02 \times 10^{-8}$ |
| 12  | rs116873087 | 112,511,913 | 12q24.13 | C            | G            | 1.351           | 0.3008            | $1.06 \times 10^{-7}$ |
| 12  | rs3782886   | 112,110,489 | 12q24.12 | C            | T            | 1.341           | 0.2934            | $1.37 \times 10^{-7}$ |
| 12  | rs11066001  | 112,119,171 | 12q24.12 | C            | T            | 1.341           | 0.2934            | $1.94 \times 10^{-7}$ |
| 12  | rs79105258  | 111,718,231 | 12q24.11 | A            | C            | 1.346           | 0.2971            | $2.44 \times 10^{-7}$ |
| 12  | rs12231737  | 112,574,616 | 12q24.13 | T            | C            | 1.326           | 0.2822            | $3.07 \times 10^{-7}$ |
| 12  | rs4646776   | 112,230,019 | 12q24.12 | C            | G            | 1.329           | 0.2844            | $3.09 \times 10^{-7}$ |
| 12  | rs3809297   | 111,609,727 | 12q24.11 | T            | G            | 1.333           | 0.2874            | $3.41 \times 10^{-7}$ |
| 12  | rs671       | 112,241,766 | 12q24.12 | A            | G            | 1.324           | 0.2807            | $4.33 \times 10^{-7}$ |
| 12  | rs2188380   | 111,386,127 | 12q24.11 | C            | T            | 1.348           | 0.2986            | $6.10 \times 10^{-7}$ |
| 12  | rs149607519 | 111,389,437 | 12q24.11 | G            | C            | 1.348           | 0.2986            | $6.10 \times 10^{-7}$ |
| 12  | rs12229654  | 111,414,461 | 12q24.11 | G            | T            | 1.343           | 0.2949            | $8.10 \times 10^{-7}$ |
| 12  | rs11065828  | 111,629,389 | 12q24.11 | A            | C            | 1.306           | 0.2670            | $1.16 \times 10^{-6}$ |
| 12  | rs11066325  | 112,930,475 | 12q24.13 | C            | T            | 1.304           | 0.2654            | $2.77 \times 10^{-6}$ |
| 12  | rs12227162  | 111,367,244 | 12q24.11 | T            | C            | 1.326           | 0.2822            | $2.93 \times 10^{-6}$ |
| 12  | rs11066280  | 112,817,783 | 12q24.13 | A            | T            | 1.291           | 0.2554            | $3.85 \times 10^{-6}$ |
| 12  | rs11066015  | 112,168,009 | 12q24.12 | A            | G            | 1.285           | 0.2508            | $5.70 \times 10^{-6}$ |

11 Abbreviations: Chr, chromosome; SNP, single nucleotide polymorphism; OR, odds ratio. <sup>1</sup> Odds ratio for the  
 12 habitual coffee consumption; <sup>2</sup> Beta ( $\beta$ ) coefficient was obtained from the GWAS; <sup>3</sup> P-value was calculated using  
 13 a Wald test from logistic regression model adjusted for age (years; continuous), sex, alcohol consumption (g/day;  
 14 continuous), and body mass index (BMI, <23, 23 to <25, 25 to <30 and  $\geq 30$  kg/m<sup>2</sup>).
